# Supplementary material for: Pharmacological Stimulation of Soluble Guanylate Cyclase Counteracts the Profibrotic Activation of Human Conjunctival Fibroblasts
Source: MDPI journal article supplement (doi:10.3390/cells13040360), 2024-02-18
Supplement: s1 [file s1]

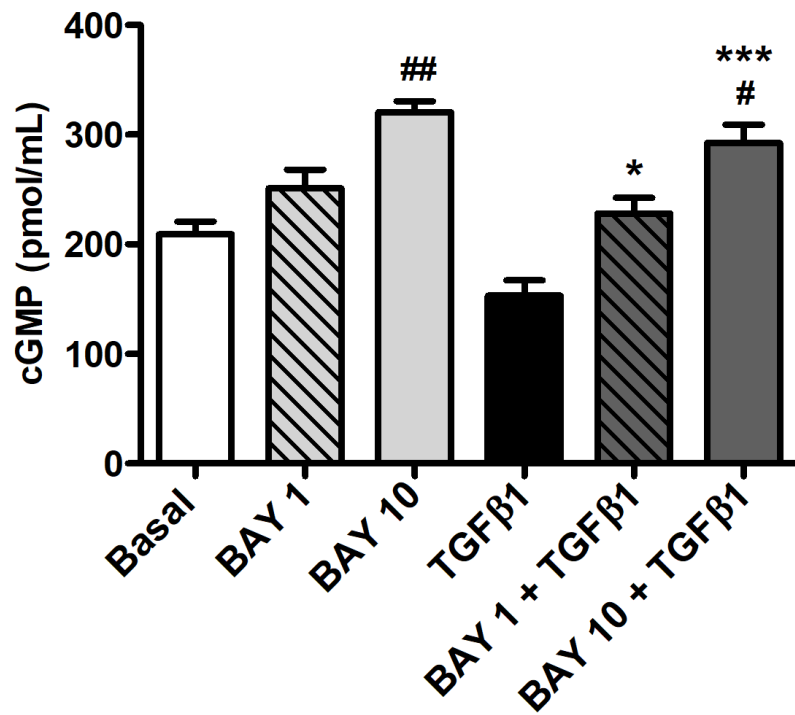

**Supplementary Figure S1.** Intracellular levels of cGMP in human conjunctival fibroblasts. Stimulation of sGC with BAY 41-2272 effectively increases the intracellular levels of cGMP in human conjunctival fibroblasts. Bars represent the mean  $\pm$  SEM of triplicate determinations from three cell lines. ##  $p < 0.01$  and #  $p < 0.05$  vs. basal condition, \*\*\*  $p < 0.001$  and \*  $p < 0.05$  vs. TGFβ1 (Tukey's test). cGMP, cyclic guanosine monophosphate; SEM, standard error of the mean; sGC, soluble guanylate cyclase; TGFβ1, transforming growth factor β1.
